# Supplementary material
Source: publisher figshare collection journal article supplement (https://gsapubs.figshare.com/ndownloader/files/23307284)
Supplement: Supplementary file 1 [file 23307284]

## Sheet: Sample #48c
	Conc. (ppm)							Isotope ratios, uncorrected									Ages (Ma), uncorrected										Isotope ratios, 207Pb corrected					Ages (Ma), 207Pb corrected					Isotope ratios, 204Pb corrected									Ages (Ma), 204Pb corrected
Spot	U	Th	206Pb (ppm)	f206% (204)	f206% (208)	232Th/235U		207Pb/206Pb	±err	206Pb/238U	±err	207Pb/235U	±err	208Pb/232Th	±err		207Pb/206Pb	±err	206Pb/238U	±err	207Pb/235U	±err	d(%)	208Pb/232Th	±err		206Pb/238U	±err	208Pb/232Th	±err		206Pb/238U	±err	208Pb/232Th	±err		207Pb/206Pb	±err	206Pb/238U	±err	207Pb/235U	±err	208Pb/232Th	±err		207Pb/206Pb	±err	206Pb/238U	±err
Sample #48c (n=55)
#48c--5b.1	445.8	525.6	16.1	0.683327	-0.056	1.2095		0.05138	0.00016	0.04184	0.00097	0.29642	0.00691	0.01313	0.00031		257.9	7.2	264.2	6	263.6	5.4	-0.2	263.6	6.2		0.04183	0.00098	0.01313	0.00031		264.2	6.1	263.6	6.2		0.04575	0.00222	0.04155	0.00097	0.2621	0.01412	0.01262	0.0002				262.4	6
#48c-37R.1	751.7	7.9	24.2	0	0.109	0.0108		0.05298	0.00074	0.03714	0.00133	0.27134	0.01043	0.01957	0.00214		327.9	31.4	235.1	8.3	243.8	8.4	3.6	391.7	42.5		0.03703	0.00137	0.01961	0.00215		234.4	8.5	392.4	42.7		0.05298	0.0012	0.03714	0.00133	0.27131	0.01153	0.01953	0.00818		327.9	50.6	235.1	8.3
#48c-5R.1	31.3	1.8	1.1	7.37274	2.702	0.0584		0.07691	0.00292	0.03881	0.00174	0.41158	0.02414	0.0494	0.00788		1118.9	74	245.5	10.9	350	17.5	29.8	974.5	152.3		0.03753	0.00184	0.04904	0.00803		237.5	11.5	967.5	154.1		0.01378	0.02711	0.03588	0.00197	0.06817	0.13415	-0.0553	-0.04133				227.2	12.3
#48c-25R.1	124.1	93.5	4.1	2.80524	1.356	0.7728		0.06127	0.00176	0.03842	0.00066	0.3246	0.01086	0.01334	0.00038		648.7	60.6	243	4.1	285.4	8.3	14.8	267.8	7.6		0.0379	0.00073	0.01317	0.00035		239.8	4.6	264.4	7		0.03795	0.00222	0.03732	0.00064	0.19524	0.01195	0.01036	0.00034				236.2	4
#48c-32b.1	213.8	3.7	7.3	0	0.151	0.0176		0.05269	0.00135	0.03936	0.00046	0.28596	0.00803	0.01945	0.00189		315.5	57.2	248.9	2.9	255.4	6.4	2.6	389.3	37.5		0.03928	0.00055	0.01949	0.00189		248.4	3.4	390.1	37.4		0.05269	0.00135	0.03936	0.00046	0.28595	0.00812	0.01941	0.00186		315.5	57.2	248.9	2.9
#48c-15.2	344.4	286.4	11.9	0.485522	-0.069	0.8529		0.05189	0.00115	0.03992	0.00061	0.28561	0.00768	0.01251	0.00028		280.5	50	252.3	3.7	255.1	6.1	1	251.3	5.6		0.03986	0.00065	0.0125	0.00026		252	4.1	251	5.3		0.0479	0.00183	0.03972	0.00061	0.26236	0.01084	0.01202	0.00025			182.5	251.1	3.8
#48c-19.2	288.8	208.7	10	0.953062	0.042	0.7411		0.05323	0.00084	0.03997	0.0008	0.29339	0.0075	0.01262	0.00027		338.7	35.2	252.6	4.9	261.2	5.9	3.2	253.5	5.4		0.03985	0.00084	0.01259	0.00026		251.9	5.2	252.8	5.1		0.04538	0.00194	0.03958	0.0008	0.24765	0.01172	0.01152	0.00024				250.2	4.9
#48c-17.1	114.5	1.8	4.1	0.46754	0.41	0.0165		0.05805	0.00208	0.04127	0.0013	0.33029	0.01578	0.03441	0.00238		531.7	76.6	260.7	8.1	289.8	12.1	10	683.7	46.5		0.04091	0.00141	0.0346	0.00236		258.5	8.8	687.4	46.1		0.05424	0.0046	0.04107	0.00131	0.30717	0.02784	0.00941	0.02503		381.1	180	259.5	8.1
#48c-24.1	176.2	63	6.4	0.359646	-0.502	0.3666		0.05167	0.00071	0.04198	0.00115	0.29911	0.00917	0.01207	0.00068		270.9	31.2	265.1	7.1	265.7	7.2	0.2	242.5	13.6		0.04196	0.0012	0.01206	0.00067		265	7.4	242.3	13.4		0.04872	0.00217	0.04183	0.00115	0.28096	0.01472	0.01119	0.00082		134.3	101.4	264.1	7.1
#48c-6.2	276.7	140.6	10.6	0.377628	-0.256	0.521		0.05204	0.00049	0.04424	0.00081	0.31745	0.0065	0.01348	0.0004		287.1	21.4	279.1	5	279.9	5	0.2	270.6	8		0.04423	0.00085	0.01347	0.0004		279	5.2	270.4	7.9		0.04894	0.0021	0.04407	0.00081	0.29739	0.01395	0.0128	0.00052		145.1	97.8	278	5
#48c-7R.1	246.3	22.3	9.7	0.971044	0.438	0.0928		0.05454	0.00085	0.04556	0.00192	0.34262	0.01536	0.01874	0.00098		393.5	34.6	287.2	11.8	299.2	11.7	4	375.2	19.4		0.0454	0.00197	0.01872	0.00097		286.2	12.1	374.9	19.3		0.04655	0.00223	0.04511	0.0019	0.28954	0.01851	0.00859	0.00251			137.3	284.4	11.7
#48c-12.1	156.6	1	7.2	0.305699	0.247	0.0064		0.05795	0.00105	0.05342	0.00194	0.42683	0.0173	0.05953	0.00823		527.9	39.2	335.5	11.9	360.9	12.4	7	1168.7	157.6		0.05308	0.00201	0.06005	0.00823		333.4	12.3	1178.6	156.3		0.05546	0.00302	0.05325	0.00194	0.40725	0.02673	0.00562	0.05781		430.9	117	334.5	11.9
#48c-16R.1	101.9	21	4.8	2.08595	1.471	0.2113		0.06078	0.00161	0.05486	0.0022	0.45977	0.02211	0.02492	0.00151		631.5	56	344.3	13.5	384.1	15.5	10.4	497.5	29.8		0.05432	0.0023	0.0248	0.00147		341	14.1	495.1	29		0.04356	0.00374	0.0537	0.00216	0.32251	0.03062	0.01341	0.00237				337.2	13.3
#48c-8.1	212.2	1.8	10.3	-0.107894	0.228	0.0087		0.05535	0.00081	0.05601	0.00074	0.42749	0.00843	0.04836	0.00699		426.5	32.2	351.3	4.5	361.4	6	2.8	954.5	135.2		0.05586	0.00079	0.04888	0.00699		350.4	4.8	964.4	134.3		0.05623	0.00102	0.05607	0.00074	0.4347	0.00991	0.06297	0.01165		461.3	39.8	351.7	4.5
#48c-34.1	222.4	67.9	11.9	-0.125876	-0.167	0.3133		0.05425	0.00098	0.06204	0.0011	0.46407	0.01172	0.01873	0.00054		381.5	40	388	6.7	387.1	8.2	-0.2	375	10.7		0.06204	0.00118	0.01872	0.00052		388	7.2	374.9	10.4		0.05527	0.00198	0.06212	0.00111	0.47342	0.01902	0.01926	0.00092		423.3	78	388.5	6.7
#48c-34.2	645	63	35.4	0.161841	-0.122	0.1002		0.0544	0.0004	0.06346	0.00104	0.47599	0.00852	0.01823	0.0006		387.7	16.4	396.6	6.3	395.3	5.9	-0.4	365.1	11.9		0.06347	0.00108	0.01821	0.0006		396.7	6.6	364.8	11.8		0.05308	0.00074	0.06336	0.00104	0.46368	0.01015	0.01606	0.00103		332.3	31.4	396	6.3
#48c-23R.1	207	14.5	12.3	0.125876	-0.04	0.0719		0.05381	0.00104	0.06843	0.00207	0.50774	0.01823	0.02055	0.00079		363.1	43	426.7	12.5	416.9	12.3	-2.4	411.1	15.6		0.06856	0.00219	0.02058	0.00077		427.5	13.2	411.7	15.3		0.05278	0.0036	0.06834	0.00209	0.49738	0.03723	0.01801	0.00797		319.5	148.2	426.2	12.6
#48c-36R.1	263.8	101.6	16.2	0.251752	0.297	0.3952		0.05972	0.00076	0.07107	0.00089	0.58519	0.0105	0.02319	0.00059		593.5	27.4	442.6	5.4	467.8	6.8	5.4	463.3	11.6		0.07069	0.00096	0.02308	0.00058		440.3	5.8	461.2	11.4		0.05768	0.00161	0.07089	0.0009	0.56377	0.01735	0.02224	0.00077		517.5	60	441.5	5.4
#48c-21.1	135.2	3.6	8.4	0.215788	0.249	0.0276		0.06143	0.00121	0.07159	0.00186	0.60634	0.01982	0.0357	0.00271		654.3	41.8	445.7	11.2	481.2	12.6	7.4	708.9	52.9		0.07105	0.00197	0.03577	0.00274		442.5	11.9	710.3	53.3		0.05968	0.00337	0.07143	0.00187	0.58786	0.03663	0.02389	0.01986		592.1	117.8	444.8	11.3
#48c-39R.1	110.6	9.6	6.9	0	0.353	0.0892		0.05834	0.00083	0.07236	0.00162	0.58206	0.01542	0.02844	0.0012		542.5	30.8	450.4	9.8	465.8	10	3.4	566.8	23.6		0.07213	0.00173	0.02846	0.00119		449	10.4	567.2	23.4		0.05834	0.00083	0.07236	0.00162	0.58206	0.01558	0.02844	0.00078		542.5	30.8	450.4	9.8
#48c-4.1	362.1	75	23.2	0.377628	0.373	0.2126		0.05708	0.00068	0.07408	0.00728	0.58295	0.05774	0.02569	0.00264		494.7	26	460.7	43.9	466.4	37.8	1.2	512.6	52		0.07398	0.00741	0.0257	0.00267		460.1	44.7	512.9	52.5		0.054	0.00083	0.0738	0.00725	0.54951	0.05469	0.02291	0.00084		371.1	34.4	459	43.7
#48c-18R.1	208.1	38.3	13.5	0.719292	0.193	0.1887		0.05703	0.00071	0.07492	0.00132	0.58915	0.0127	0.02487	0.0007		492.7	27.2	465.7	7.9	470.3	8.1	1	496.5	13.8		0.07483	0.0014	0.02487	0.00069		465.2	8.4	496.5	13.6		0.05115	0.00145	0.07438	0.00131	0.52455	0.01763	0.01884	0.00131		247.5	64	462.5	7.9
#48c-11.3	492.6	229.9	32.3	0.341664	0.098	0.4787		0.05958	0.00054	0.07579	0.00116	0.62268	0.01107	0.02388	0.00058		588.3	19.6	470.9	6.9	491.5	6.9	4.2	476.9	11.4		0.07546	0.00122	0.02378	0.00057		469	7.3	475	11.3		0.05681	0.00083	0.07553	0.00116	0.59159	0.0127	0.02274	0.0005		484.1	31.8	469.4	7
#48c-16.2	241.6	179.1	16.1	-0.215788	0.412	0.7606		0.05869	0.00158	0.07692	0.00184	0.62241	0.02238	0.02469	0.00078		555.7	57.6	477.7	11	491.4	14.1	2.8	492.9	15.4		0.0767	0.002	0.02463	0.00074		476.4	12	491.8	14.6		0.06043	0.00192	0.07709	0.00185	0.64234	0.02565	0.02515	0.00056		619.1	67.2	478.7	11.1
#48c-11.2	932	221.3	61.9	0.161841	0.019	0.2435		0.05805	0.00024	0.07669	0.0014	0.61384	0.01148	0.02396	0.00065		531.7	9	476.3	8.4	486	7.3	2	478.5	12.8		0.07653	0.00144	0.02391	0.00065		475.4	8.7	477.6	12.9		0.05674	0.0004	0.07657	0.0014	0.59896	0.0119	0.02289	0.00054		481.3	15.4	475.6	8.4
#48c-8.2	3053.9	2198.6	210.1	0.017982	-0.369	0.7386		0.05665	0.00012	0.07862	0.00158	0.62097	0.01242	0.02397	0.00049		477.9	4.8	487.9	9.5	490.5	7.9	0.6	478.7	9.7		0.07864	0.00162	0.02397	0.00049		488	9.7	478.7	9.7		0.0565	0.00012	0.07861	0.00158	0.6124	0.01257	0.02366	8e-05		472.3	4.6	487.8	9.5
#48c-4.3	256.1	49.3	17.6	0.125876	0.212	0.1976		0.0633	0.00081	0.07929	0.00592	0.69206	0.05245	0.02637	0.00206		718.3	27	491.9	35.5	534	31.9	7.8	526	40.6		0.07864	0.00604	0.02618	0.00206		488	36.2	522.3	40.5		0.06228	0.00136	0.07919	0.00591	0.68008	0.05298	0.0253	0.00121		683.9	46.2	491.3	35.4
#48c-28.2	454.2	298	31.6	0.071929	-0.26	0.673		0.05623	0.0004	0.08037	0.00115	0.62316	0.01	0.02438	0.00042		461.5	15.6	498.3	6.8	491.8	6.2	-1.4	486.8	8.3		0.08045	0.0012	0.0244	0.00041		498.8	7.1	487.2	8.1		0.05565	0.00074	0.08031	0.00115	0.61619	0.01227	0.0242	0.0003		438.3	29.4	498	6.9
#48c-17.2	221.2	47.6	15.7	-0.089912	0.274	0.2206		0.06006	0.00093	0.0818	0.00146	0.67735	0.01601	0.02746	0.00075		605.7	33.2	506.9	8.7	525.2	9.8	3.4	547.5	14.8		0.08152	0.00158	0.0274	0.00073		505.2	9.5	546.3	14.3		0.06079	0.00121	0.08187	0.00146	0.68621	0.01856	0.02816	0.00091		631.7	42.4	507.3	8.7
#48c-18.2	1860.5	45.2	133.5	0.089912	-0.016	0.0249		0.05788	0.00033	0.08293	0.00118	0.66186	0.01013	0.02462	0.00108		525.3	12.4	513.6	7	515.8	6.3	0.4	491.5	21.3		0.0829	0.00125	0.02459	0.00109		513.4	7.4	490.9	21.4		0.05715	0.00037	0.08286	0.00118	0.6529	0.01045	0.01831	0.00163		497.3	14	513.1	7
#48c-2.1	158.1	33.6	11.5	0	0.094	0.218		0.05678	0.00088	0.08431	0.0021	0.66012	0.01936	0.02689	0.0013		483.1	33.8	521.8	12.5	514.7	11.9	-1.4	536.3	25.6		0.08441	0.00223	0.02694	0.00129		522.4	13.3	537.2	25.4		0.05678	0.00088	0.08431	0.0021	0.66005	0.01951	0.02689	0.00111		483.1	33.8	521.8	12.5
#48c-26.2	339.1	209.7	24.7	0.197805	-0.249	0.6343		0.05836	0.00062	0.08413	0.00146	0.67698	0.01374	0.02547	0.00054		543.3	23	520.7	8.7	524.9	8.3	0.8	508.3	10.6		0.08406	0.00156	0.02543	0.00053		520.3	9.3	507.6	10.5		0.05675	0.001	0.08396	0.00146	0.65704	0.01644	0.02492	0.00038		481.9	38.6	519.7	8.6
#48c-38R.2	269.1	121.8	19.7	0.143858	0.256	0.4645		0.05972	0.00044	0.08464	0.0012	0.69694	0.01114	0.02717	0.00066		593.5	15.8	523.8	7.2	537	6.7	2.4	541.8	13		0.08443	0.00127	0.02712	0.00065		522.5	7.6	540.8	12.9		0.05855	0.00077	0.08452	0.0012	0.68236	0.0134	0.02661	0.00057		550.5	28.4	523	7.1
#48c-2.2	113.9	53.8	8.4	0.377628	0.336	0.4849		0.05633	0.00147	0.0849	0.00906	0.65942	0.07244	0.02748	0.00298		465.5	56.8	525.3	54.1	514.3	45.4	-2.2	547.9	58.7		0.08507	0.00936	0.02756	0.00299		526.3	55.9	549.4	58.7		0.05325	0.00252	0.08458	0.00903	0.62101	0.07254	0.02609	0.00099		339.5	103.8	523.4	53.9
#48c-31.1	508.6	48.2	37.9	0.071929	-0.087	0.0972		0.05707	0.00047	0.0862	0.00166	0.67833	0.01421	0.02514	0.00097		494.3	18	533	9.8	525.8	8.7	-1.4	501.8	19.1		0.0863	0.00174	0.02514	0.00097		533.6	10.3	501.9	19.1		0.05649	0.00066	0.08614	0.00166	0.67087	0.01534	0.02379	0.0013		471.5	25.8	532.7	9.9
#48c-29.2	1594.1	301.3	120.3	0.125876	0.102	0.1939		0.05881	0.00019	0.0872	0.00075	0.70705	0.00651	0.02795	0.0003		560.1	7	539	4.5	543	3.9	0.8	557.1	5.9		0.08714	0.00079	0.02794	0.0003		538.6	4.7	557	5.9		0.05779	0.00025	0.08709	0.00075	0.69394	0.00712	0.02677	0.00023		521.7	9.4	538.3	4.4
#48c-20.1	377.1	67	28.6	0.071929	-0.141	0.1822		0.05706	0.00101	0.08758	0.00176	0.689	0.01844	0.02577	0.00071		493.9	38.6	541.2	10.4	532.2	11.1	-1.6	514.2	14		0.08771	0.00191	0.02578	0.00069		542	11.3	514.5	13.6		0.05648	0.00111	0.08752	0.00176	0.68149	0.01936	0.02504	0.00072		471.1	43.2	540.8	10.4
#48c-21B-2	234.3	234.7	17.7	0.521487	-0.791	1.0276		0.06059	0.00054	0.0874	0.00144	0.73019	0.0137	0.02589	0.00064		624.7	19.2	540.1	8.5	556.7	8.1	3	516.6	12.6		0.08712	0.00152	0.02579	0.00063		538.5	9	514.6	12.4		0.05635	0.00166	0.08695	0.00144	0.67558	0.02301	0.02496	0.00057		466.3	64.2	537.5	8.6
#48c-3.2	492.5	218.8	37.8	0.161841	-0.027	0.4558		0.05665	0.00027	0.08859	0.00175	0.69196	0.01408	0.02734	0.00059		477.9	10.6	547.2	10.4	534	8.5	-2.4	545.1	11.6		0.08879	0.00182	0.0274	0.00059		548.4	10.8	546.3	11.6		0.05533	0.00068	0.08845	0.00175	0.67481	0.01591	0.02668	0.00037		425.7	27.4	546.3	10.3
#48c-14R.1	398.6	102.1	31	0.017982	1.489	0.2629		0.06533	0.00043	0.08996	0.00162	0.81034	0.01552	0.0381	0.001		784.9	13.8	555.3	9.6	602.6	8.7	7.8	755.7	19.5		0.08916	0.00169	0.03805	0.00101		550.6	10	754.8	19.6		0.06519	0.00064	0.08994	0.00162	0.8084	0.01682	0.03797	0.00069		780.3	20.4	555.2	9.6
#48c-35R.1	401.7	56.6	32.6	0.179823	0.167	0.1446		0.05877	0.00056	0.09383	0.00192	0.76035	0.01719	0.03123	0.00076		558.7	20.6	578.1	11.3	574.2	10	-0.6	621.5	14.9		0.09387	0.00201	0.0313	0.00076		578.4	11.9	622.8	14.9		0.05731	0.00073	0.09366	0.00192	0.74013	0.01806	0.02879	0.0008		503.5	28	577.2	11.3
#48c-21.2	625.4	153.8	55.1	0.017982	0.987	0.2523		0.07486	0.00771	0.10174	0.00604	1.05016	0.12488	0.03941	0.0038		1064.7	194.4	624.6	35.4	729	63.9	14.4	781.2	74		0.09981	0.00701	0.0389	0.00343		613.3	41.2	771.3	66.6		0.07472	0.00771	0.10172	0.00604	1.04795	0.12485	0.03925	0.00299		1060.9	194.8	624.5	35.4
#48c-31.2	368	180.5	32.9	-0.071929	0.243	0.5032		0.06265	0.00048	0.10316	0.00151	0.89112	0.01473	0.03278	0.00062		696.3	16.4	632.9	8.8	647	8	2.2	651.9	12.2		0.1029	0.00161	0.03273	0.00061		631.4	9.4	650.8	11.9		0.06323	0.00067	0.10323	0.00151	0.9	0.0166	0.03309	0.00042		715.9	22.4	633.3	8.8
#48c-30.2	195.5	67.2	24	0.575434	1.912	0.3525		0.08573	0.00043	0.14216	0.00249	1.68029	0.03063	0.05864	0.00125		1332.1	9.6	856.9	14.1	1001.1	11.7	14.4	1151.7	23.9		0.1387	0.00261	0.05802	0.00128		837.3	14.8	1139.8	24.4		0.0812	0.00104	0.14137	0.00248	1.58274	0.03483	0.05384	0.00114		1226.3	24.8	852.4	14
#48c-30.1	340.2	28.8	42.9	0.143858	0.762	0.0868		0.08426	0.0008	0.1458	0.00368	1.69375	0.0457	0.07077	0.00266		1298.5	18.4	877.4	20.8	1006.2	17.4	12.8	1381.9	50.2		0.14264	0.00387	0.07115	0.00281		859.6	21.9	1389.1	52.9		0.08313	0.00102	0.1456	0.00368	1.66885	0.04721	0.06581	0.00298		1272.3	23.6	876.2	20.7
#48c-7.2	427.7	101.1	56.3	0.071929	-0.567	0.2424		0.0727	0.00106	0.15199	0.0028	1.52347	0.03577	0.03899	0.00096		1005.7	29.2	912.1	15.7	939.9	14.5	3	773	18.7		0.15131	0.0031	0.03858	0.00092		908.3	17.4	765.1	18		0.07213	0.00116	0.15189	0.0028	1.5105	0.03734	0.03807	0.00087		989.5	32.4	911.5	15.7
#48c-12.2	63.3	38.1	8.8	0.215788	0.878	0.6178		0.07795	0.00053	0.16051	0.00381	1.72516	0.04261	0.05299	0.00237		1145.7	13.4	959.6	21.2	1017.9	16	5.8	1043.5	45.5		0.159	0.00404	0.0527	0.00245		951.2	22.5	1038	47		0.07624	0.00136	0.16018	0.00381	1.68383	0.05041	0.05184	0.00213		1101.5	35.2	957.8	21.2
#48c-5.2	215.2	75.2	29.9	0.053947	0.124	0.3586		0.07288	0.00064	0.16048	0.00244	1.61251	0.02833	0.04971	0.00105		1010.7	17.6	959.4	13.5	975.1	11.1	1.6	980.5	20.3		0.16006	0.00265	0.04963	0.00105		957.1	14.7	979	20.3		0.07245	0.00113	0.1604	0.00244	1.6023	0.03548	0.04922	0.00123		998.7	31.4	959	13.6
#48c-23.2	84.5	41.3	11.9	0	0.039	0.5006		0.07651	0.00091	0.16202	0.00569	1.7092	0.0634	0.0493	0.00254		1108.5	23.6	968	31.7	1012	24.1	4.4	972.6	49		0.16087	0.00606	0.04896	0.00258		961.6	33.8	966.1	49.6		0.07651	0.00091	0.16202	0.00569	1.70919	0.06367	0.04931	0.0018		1108.5	23.6	968	31.7
#48c-14.3	686.7	85.2	101.5	-0.035965	0.133	0.1273		0.07389	0.0004	0.17083	0.00344	1.74055	0.03627	0.05526	0.00151		1038.5	10.8	1016.7	19	1023.7	13.6	0.6	1087	28.9		0.17063	0.00368	0.05539	0.00157		1015.6	20.3	1089.6	30.1		0.07418	0.00043	0.17089	0.00344	1.74774	0.03716	0.05625	0.00107		1046.3	11.6	1017	19
#48c-32.2	232.4	136.5	34.4	0.053947	-0.065	0.6027		0.07577	0.00089	0.17079	0.00157	1.78433	0.02658	0.05123	0.00065		1089.1	23.2	1016.5	8.7	1039.8	9.8	2.2	1009.7	12.5		0.17016	0.00185	0.05102	0.00061		1013	10.2	1005.7	11.8		0.07534	0.00101	0.1707	0.00157	1.77331	0.02946	0.05092	0.00047		1077.7	26.6	1016	8.7
#48c-1.2	226	69.1	33.6	-0.017982	0.023	0.3137		0.07184	0.00049	0.17158	0.00864	1.6997	0.08635	0.05205	0.00288		981.5	13.8	1020.8	47.7	1008.4	33	-1.2	1025.5	55.4		0.1719	0.00915	0.05216	0.003		1022.6	50.5	1027.6	57.6		0.07198	0.00092	0.17161	0.00864	1.70324	0.08871	0.05226	0.00155		985.5	25.8	1021	47.8
#48c-13.2	797.6	428.6	119.1	0.017982	-0.076	0.5512		0.07428	0.00021	0.17256	0.00329	1.76744	0.03405	0.05163	0.00102		1049.1	5.6	1026.2	18.1	1033.6	12.6	0.8	1017.4	19.6		0.17236	0.00349	0.05155	0.00105		1025.1	19.2	1015.8	20.2		0.07414	0.00026	0.17253	0.00329	1.76363	0.03478	0.05152	0.0003		1045.3	7	1026	18.1
#48c-22.2	86	32.1	14.6	0.557451	0.087	0.3828		0.07824	0.00088	0.19588	0.0051	2.11303	0.05995	0.0596	0.00206		1152.9	22.2	1153.1	27.5	1153.1	19.8	0	1170	39.3		0.19587	0.00563	0.05965	0.00212		1153.1	30.4	1171	40.5		0.07382	0.0018	0.19486	0.00508	1.98323	0.07113	0.0538	0.00229		1036.5	48.4	1147.7	27.5
#48c-33.2	780.8	244.7	194.2	0.017982	0.205	0.3215		0.11924	0.00095	0.28737	0.00498	4.72447	0.09024	0.08757	0.00252		1944.9	14.2	1628.4	25	1771.6	16.1	8	1696.6	46.9		0.27909	0.00576	0.08549	0.00268		1586.8	29.1	1657.9	49.8		0.11911	0.00096	0.28732	0.00498	4.71854	0.09182	0.08725	0.00199		1942.9	14.4	1628.1	24.9
[truncated: 18 more columns]

## Sheet: Sample #47a
	Conc. (ppm)							Isotope ratios, uncorrected									Ages (Ma), uncorrected										Isotope ratios, 207Pb corrected					Ages (Ma), 207Pb corrected					Isotope ratios, 204Pb corrected									Ages (Ma), 204Pb corrected
Spot	U	Th	206Pb (ppm)	f206% (204)	f206% (208)	232Th/235U		207Pb/206Pb	±err	206Pb/238U	±err	207Pb/235U	±err	208Pb/232Th	±err		207Pb/206Pb	±err	206Pb/238U	±err	207Pb/235U	±err	d(%)	208Pb/232Th	±err		206Pb/238U	±err	208Pb/232Th	±err		206Pb/238U	±err	208Pb/232Th	±err		207Pb/206Pb	±err	206Pb/238U	±err	207Pb/235U	±err	208Pb/232Th	±err		207Pb/206Pb	±err	206Pb/238U	±err
Sample #47a (n=51)
#47a-R17.1	193.9	1.7	3.3	0.359646	0.387	0.0092		0.0556	0.0005	0.01953	0.0004	0.14971	0.00336	0.02341	0.00203		436.5	19.8	124.7	2.5	141.7	3	12	467.7	40.2		0.01934	0.0004	0.02343	0.00205		123.5	2.5	468.1	40.4		0.05266	0.00107	0.01946	0.0004	0.14129	0.00411	0.00694	0.00529		314.3	45.6	124.2	2.5
#47a-30.1	513.2	2.1	8.7	0.23377	0.072	0.0042		0.05025	0.00079	0.01955	0.00032	0.13542	0.00306	0.01312	0.00166		206.5	36.2	124.8	2	129	2.8	3.2	263.4	33.1		0.0195	0.00033	0.01314	0.00166		124.5	2.1	263.8	33.1		0.04833	0.00123	0.0195	0.00032	0.12996	0.00397	-0.01021	-0.01092		115.5	59	124.5	2
#47a-6.1	701.1	3.1	12	0.179823	0.148	0.0045		0.05029	0.00055	0.0197	0.00036	0.13662	0.0029	0.01972	0.00106		208.5	25	125.8	2.3	130	2.6	3.2	394.7	21.1		0.01966	0.00038	0.01983	0.00106		125.5	2.4	396.8	21.1		0.04881	0.00137	0.01966	0.00036	0.13235	0.00447	0.00283	0.01357		138.9	64.8	125.5	2.3
#47a-R12.1	227	3.3	3.9	0.899115	1.501	0.0149		0.06366	0.00085	0.02	0.00037	0.17553	0.00398	0.04839	0.00389		730.3	28.2	127.7	2.4	164.2	3.4	22.2	955	75.1		0.01961	0.00039	0.04886	0.00393		125.2	2.5	964.2	75.6		0.05635	0.00098	0.01981	0.00037	0.15396	0.00395	0.02241	0.00403		466.3	38.2	126.5	2.3
#47a-7.1	355	1.1	6.1	0.23377	0.176	0.003		0.05009	0.00093	0.01988	0.00024	0.13728	0.00303	0.03025	0.00417		199.1	42.6	126.9	1.5	130.6	2.7	2.8	602.3	82		0.01983	0.00026	0.03064	0.00428		126.6	1.6	610	83.8		0.04817	0.0021	0.01983	0.00024	0.13172	0.006	-0.00261	-0.03098		107.7	100	126.6	1.5
#47a-27.1	467.5	1.6	8.1	0.215788	0.033	0.0036		0.05237	0.00113	0.01994	0.00026	0.14396	0.00364	0.01021	0.00053		301.7	48.4	127.3	1.7	136.6	3.3	6.8	205.3	10.6		0.01983	0.00028	0.01018	0.00051		126.6	1.8	204.7	10.3		0.0506	0.0022	0.0199	0.00026	0.13882	0.00633	-0.01555	-0.02569		222.9	97.6	127	1.7
#47a-R7.1	198.6	0.6	3.5	0.449558	0.346	0.0031		0.05326	0.00232	0.02037	0.00048	0.14961	0.00743	0.05414	0.00552		339.9	95.8	130	3	141.6	6.6	8.2	1065.6	106.1		0.02024	0.00054	0.05466	0.00552		129.2	3.4	1075.5	105.5		0.04958	0.00246	0.02028	0.00048	0.13859	0.00763	-0.00946	-0.01369		175.1	112	129.4	3
#47a-R20.1	84.3	0.7	1.5	0.611398	1.013	0.008		0.06072	0.00259	0.02052	0.0003	0.17184	0.00775	0.06095	0.00688		629.3	89.4	130.9	1.9	161	6.7	18.6	1195.7	131.5		0.0202	0.00036	0.06147	0.00688		128.9	2.3	1205.6	130.7		0.05575	0.00397	0.02039	0.00031	0.15673	0.01144	0.02705	0.01966		442.3	151.2	130.1	1.9
#47a-R23.1	39.1	1.1	0.7	1.51051	1.435	0.0287		0.06084	0.0018	0.02061	0.00068	0.1729	0.00765	0.02801	0.00429		633.5	62.6	131.5	4.3	161.9	6.6	18.8	558.3	84.5		0.02027	0.00071	0.02793	0.00431		129.4	4.5	556.7	84.5		0.04844	0.00587	0.02029	0.00068	0.13551	0.01705	0.00466	0.01055		120.9	263.2	129.5	4.3
#47a-R4.1	220.9	4.3	3.9	0.719292	1.051	0.02		0.05864	0.00043	0.02053	0.00027	0.16596	0.0025	0.02895	0.00188		553.7	16	131	1.7	155.9	2.2	16	576.8	37		0.02026	0.00029	0.02897	0.0019		129.3	1.8	577.2	37.4		0.05277	0.00077	0.02038	0.00027	0.14826	0.00296	0.01311	0.00237		318.9	32.6	130	1.7
#47a-R1.1	147.7	1.1	2.6	0.665345	0.783	0.0077		0.05696	0.00195	0.02057	0.00037	0.16156	0.00624	0.05042	0.00599		490.1	73.6	131.3	2.4	152.1	5.5	13.6	994.1	115.5		0.02035	0.00042	0.05093	0.006		129.9	2.7	1004	115		0.05152	0.00346	0.02043	0.00037	0.14512	0.0101	0.01198	0.01949		264.1	147.2	130.4	2.4
#47a-R3.1	269.5	1.2	4.8	0.413593	0.421	0.0047		0.05398	0.00127	0.02063	0.00037	0.15359	0.00454	0.04469	0.00298		370.3	52	131.6	2.3	145.1	4	9.4	883.6	57.7		0.02048	0.0004	0.0452	0.00298		130.7	2.5	893.5	57.6		0.05059	0.00159	0.02054	0.00037	0.1433	0.00521	0.00612	0.01057		222.5	71	131.1	2.4
#47a-R18.1	121.6	0.5	2.2	0.521487	0.313	0.0046		0.05295	0.00119	0.02064	0.0005	0.15065	0.00498	0.03603	0.00445		326.7	50.2	131.7	3.2	142.5	4.4	7.6	715.4	87		0.02051	0.00052	0.03652	0.00447		130.9	3.3	724.9	87		0.04867	0.00198	0.02053	0.0005	0.13776	0.00655	-0.01437	-0.01785		132.1	92.8	131	3.2
#47a-R6.1	164.5	0.8	2.9	1.27674	0.649	0.0052		0.05689	0.00125	0.02071	0.00028	0.16243	0.00419	0.06102	0.0075		487.3	47.8	132.1	1.7	152.8	3.6	13.6	1197.1	143.4		0.02048	0.00031	0.06154	0.0075		130.7	1.9	1207	142.3		0.04638	0.00179	0.02044	0.00028	0.1307	0.00538	-0.04871	-0.01421			108.1	130.4	1.7
#47a-17.1	305.5	1.2	5.5	0.323681	0.124	0.0041		0.05098	0.00147	0.02077	0.00025	0.14603	0.00456	0.01978	0.00202		239.9	65.2	132.5	1.6	138.4	4	4.2	395.9	40.1		0.0207	0.00029	0.01987	0.00201		132.1	1.9	397.7	39.9		0.04832	0.00265	0.0207	0.00025	0.13792	0.00777	-0.01552	-0.02747		115.1	124.6	132.1	1.6
#47a-R5.1	252.1	1.3	4.6	0.107894	0.501	0.0053		0.05638	0.0013	0.02095	0.00047	0.16287	0.00523	0.04782	0.00716		467.3	50.4	133.7	3	153.2	4.6	12.8	944.1	138.6		0.02075	0.00051	0.04834	0.00716		132.4	3.2	954	137.6		0.0555	0.00181	0.02093	0.00047	0.16015	0.00637	0.03883	0.0139		432.5	71	133.5	3
#47a-R24.1	105.9	0.7	1.9	1.1149	1.34	0.0067		0.06031	0.00171	0.02114	0.00048	0.17577	0.00636	0.09504	0.01496		614.7	60.2	134.9	3.1	164.4	5.5	18	1834.9	278		0.02083	0.00053	0.09558	0.01497		132.9	3.4	1844.8	274.2		0.05119	0.00348	0.0209	0.00048	0.14749	0.01059	0.01937	0.02745		249.5	149.2	133.3	3
#47a-R22.2	144	1	2.7	1.49253	3.814	0.0071		0.08208	0.00141	0.02192	0.00048	0.24803	0.00687	0.25211	0.0219		1247.5	33.2	139.8	3	225	5.6	37.8	4543.9	356.7		0.02099	0.0005	0.25273	0.02191		133.9	3.2	4553.8	350.4		0.07017	0.00227	0.02158	0.00047	0.20879	0.00819	0.1538	0.01838		933.3	64.8	137.6	3
#47a-R16.1	510.3	1.9	9.4	0.161841	0.21	0.0037		0.05139	0.00075	0.02127	0.0002	0.15073	0.00264	0.03165	0.00156		258.3	33.2	135.7	1.3	142.6	2.4	4.8	629.7	30.5		0.02119	0.00022	0.03204	0.00159		135.2	1.4	637.3	31.1		0.05006	0.00077	0.02123	0.0002	0.14658	0.00269	0.01192	0.00268		198.1	35.2	135.5	1.3
#47a-R15.1	254.4	1.2	4.7	0.449558	0.379	0.0048		0.05245	0.00061	0.02149	0.00044	0.1554	0.00367	0.04186	0.00449		305.1	26.2	137.1	2.8	146.7	3.3	6.6	828.8	87.3		0.02138	0.00046	0.04237	0.00449		136.4	2.9	838.7	86.9		0.04876	0.00063	0.02139	0.00044	0.14381	0.00352	-0.00101	-0.00455		136.5	30.2	136.4	2.7
#47a-10.1	253.4	1.1	4.7	0.521487	0.142	0.0046		0.05257	0.00017	0.02158	0.00033	0.15646	0.00248	0.02072	0.00288		310.3	7.4	137.6	2	147.6	2.2	6.8	414.5	57.1		0.02146	0.00032	0.02079	0.00292		136.9	2.1	415.8	57.8		0.04829	0.00347	0.02146	0.00034	0.14291	0.01054	-0.03176	-0.03996		113.5	161.4	136.9	2.1
#47a-R21.1	76.1	0.7	1.4	1.27674	1.687	0.0096		0.05996	0.00349	0.02195	0.00046	0.18145	0.01124	0.08788	0.00573		602.1	121.2	140	2.9	169.3	9.7	17.4	1702.3	106.7		0.02164	0.00056	0.08841	0.00573		138	3.5	1712.2	106.2		0.0495	0.00436	0.02166	0.00046	0.14782	0.01339	0.02476	0.01512		171.3	193.6	138.1	2.9
#47a-R19.1	300	1.3	5.6	0.305699	0.332	0.0044		0.05158	0.0007	0.02174	0.00037	0.15459	0.00337	0.0413	0.0023		266.9	30.8	138.6	2.3	146	3	5	817.9	44.7		0.02165	0.00039	0.04181	0.0023		138.1	2.5	827.8	44.6		0.04907	0.00094	0.02167	0.00037	0.14663	0.0038	0.00872	0.00794		151.3	44.4	138.2	2.3
#47a-10.2	134.7	59.3	3.2	0.089912	0.642	0.4518		0.05126	0.00052	0.02718	0.00041	0.19212	0.0035	0.00934	0.00032		252.5	23.2	172.9	2.6	178.4	2.9	3	187.9	6.4		0.02712	0.00043	0.00932	0.00031		172.5	2.7	187.5	6.3		0.05052	0.00082	0.02715	0.00041	0.18917	0.00424	0.00923	0.0003		219.1	37	172.7	2.6
#47a-R8.1	335.3	5.6	7.9	0.071929	0.225	0.0171		0.05092	0.00064	0.02709	0.00078	0.19017	0.00597	0.01595	0.00295		237.3	28.6	172.3	4.9	176.8	5.1	2.6	319.8	58.8		0.02702	0.00079	0.01598	0.00298		171.9	5	320.5	59.1		0.05033	0.00114	0.02707	0.00078	0.18786	0.00692	0.01354	0.00466		210.3	51.6	172.2	4.9
#47a-R2.1	203	12.4	4.8	0.323681	0.834	0.0625		0.05568	0.00104	0.02726	0.00079	0.20932	0.00725	0.01615	0.00139		439.7	41	173.4	5	193	6.1	10.2	323.8	27.7		0.02704	0.00083	0.01609	0.00137		172	5.2	322.6	27.3		0.05304	0.00131	0.02717	0.00079	0.19869	0.00759	0.01312	0.00138		330.5	55	172.8	4.9
#47a-24.2	444.7	380.1	10.7	0.017982	0.04	0.8769		0.04907	0.00106	0.02768	0.0003	0.18724	0.00453	0.00877	0.00013		151.1	50	176	1.9	174.3	3.9	-1	176.5	2.6		0.02769	0.00035	0.00878	0.00011		176.1	2.2	176.6	2.3		0.04892	0.00107	0.02767	0.0003	0.18668	0.00461	0.00876	9e-05		144.1	50.6	176	1.9
#47a-R10.1	332.6	9.6	8.1	0.269735	0.094	0.0297		0.04927	0.00118	0.02822	0.00059	0.19171	0.00613	0.01076	0.00089		160.7	55	179.4	3.7	178.1	5.2	-0.8	216.3	17.8		0.02822	0.00062	0.01078	0.00088		179.4	3.9	216.6	17.6		0.04705	0.00127	0.02814	0.00059	0.18257	0.00628	0.00527	0.00139			115.3	178.9	3.7
#47a-R22.1	336.5	19.6	8.4	0.269735	1.031	0.0598		0.05435	0.00085	0.02877	0.00147	0.21558	0.01152	0.01936	0.00118		385.5	34.8	182.8	9.2	198.2	9.6	7.8	387.5	23.4		0.02859	0.00149	0.01936	0.00117		181.7	9.4	387.5	23.2		0.05215	0.00097	0.02869	0.00147	0.20628	0.01125	0.01658	0.00084		291.9	42	182.3	9.1
#47a-18.2	261.4	344.7	9.3	0.071929	0.106	1.3526		0.05375	0.00051	0.04108	0.0003	0.30447	0.00365	0.01298	0.00019		360.7	21.2	259.5	1.8	269.9	2.9	3.8	260.6	3.8		0.04095	0.00033	0.01294	0.00018		258.7	2	259.8	3.6		0.05316	0.00081	0.04105	0.0003	0.3009	0.0052	0.01293	0.00016		335.7	34.2	259.3	1.8
#47a-26.2	419.8	232.2	15	0.017982	0.015	0.5675		0.05039	0.00021	0.04139	0.00033	0.28761	0.00257	0.01304	0.0002		213.1	9.6	261.4	2	256.7	2.1	-1.8	261.8	4		0.04143	0.00034	0.01305	0.0002		261.7	2.1	262.1	4		0.05024	0.00026	0.04138	0.00033	0.28668	0.00292	0.01301	0.00017		206.3	12	261.4	2
#47a-19.2	604.3	383.5	22.2	0.053947	0.179	0.6509		0.05311	0.00044	0.04252	0.00029	0.31138	0.00336	0.01359	0.00022		333.5	18.6	268.4	1.8	275.3	2.7	2.6	272.8	4.4		0.04242	0.0003	0.01356	0.00021		267.8	1.9	272.3	4.2		0.05267	0.00064	0.0425	0.00029	0.30862	0.00447	0.01352	0.00021		314.7	27.4	268.3	1.8
#47a-34.2	335.3	179.3	12.4	0.071929	-0.066	0.5486		0.05266	0.00079	0.0427	0.00049	0.31	0.00585	0.01333	0.0002		314.1	33.8	269.5	3	274.2	4.6	1.8	267.6	4		0.04263	0.00053	0.01331	0.00019		269.1	3.3	267.2	3.7		0.05207	0.00162	0.04267	0.00049	0.30635	0.01022	0.01321	0.00029		288.7	69.4	269.4	3.1
#47a-32.2	2508	488.6	106.7	0.017982	0.017	0.1998		0.05331	0.00031	0.04915	0.0003	0.36135	0.00303	0.01551	0.00013		342.1	13	309.3	1.8	313.2	2.2	1.2	311.1	2.6		0.0491	0.00033	0.0155	0.00012		309	2	310.8	2.4		0.05316	0.00044	0.04914	0.0003	0.36021	0.00393	0.01541	0.00021		335.7	18.8	309.2	1.8
#47a-1.2	254	83.4	12.8	0.485522	1.056	0.3369		0.05918	0.0009	0.05832	0.00055	0.47588	0.00851	0.02188	0.00035		573.7	32.8	365.4	3.4	395.2	5.8	7.6	437.4	6.9		0.05791	0.00062	0.02177	0.00033		362.9	3.8	435.3	6.6		0.05523	0.00195	0.05803	0.00056	0.44193	0.01628	0.02009	0.00078		421.5	77.2	363.7	3.5
#47a-20.2	140.4	42.3	7.2	0.143858	0.333	0.309		0.05631	0.00048	0.05947	0.00072	0.46171	0.00681	0.01988	0.00032		464.7	18.8	372.4	4.4	385.4	4.7	3.4	397.8	6.3		0.05929	0.00077	0.01983	0.00031		371.3	4.7	396.9	6.2		0.05514	0.00134	0.05938	0.00072	0.45147	0.01241	0.01929	0.00062		417.9	53.6	371.9	4.4
#47a-31.1	401.8	20.4	20.8	-0.089912	0.374	0.052		0.05924	0.00071	0.05979	0.00087	0.4884	0.00917	0.02764	0.00076		575.9	25.8	374.3	5.2	403.8	6.3	7.4	551	14.9		0.05937	0.00091	0.02761	0.00075		371.8	5.6	550.5	14.7		0.05997	0.00186	0.05984	0.00088	0.49481	0.0171	0.02981	0.00486		602.5	65.8	374.7	5.4
#47a-7.2	367	120.5	19	0.215788	0.015	0.3369		0.05516	0.00018	0.05967	0.0007	0.45381	0.00555	0.01871	0.00027		418.7	7.4	373.6	4.2	379.9	3.8	1.6	374.6	5.3		0.05957	0.00071	0.01868	0.00027		373	4.3	374	5.4		0.0534	0.00096	0.05954	0.0007	0.43838	0.00955	0.0179	0.00043		345.9	40	372.8	4.2
#47a-12.1	881.3	21.5	50.6	0.125876	0.406	0.0251		0.06058	0.00042	0.06631	0.00093	0.55384	0.00865	0.04308	0.00391		624.3	15	413.9	5.6	447.5	5.7	7.6	852.4	75.9		0.06583	0.00098	0.04348	0.00403		411	5.9	860.1	77.8		0.05956	0.00063	0.06623	0.00093	0.54387	0.00976	0.036	0.00475		587.7	22.8	413.4	5.6
#47a-9.1	593.9	89.4	34.7	0.143858	0.358	0.1544		0.05687	0.00017	0.06754	0.00074	0.52957	0.006	0.02427	0.00036		486.5	6.6	421.3	4.5	431.5	4	2.4	484.6	7.1		0.06739	0.00077	0.02426	0.00036		420.4	4.7	484.5	7.2		0.0557	0.00036	0.06744	0.00074	0.51796	0.00684	0.02293	0.0004		440.5	14.2	420.7	4.4
#47a-37.2	197.8	107.5	12.8	0.053947	0.157	0.5575		0.05503	0.0006	0.07486	0.00053	0.568	0.00737	0.0237	0.00033		413.5	24.2	465.4	3.2	456.7	4.8	-2	473.4	6.5		0.07498	0.0006	0.02375	0.00031		466.1	3.6	474.3	6.2		0.05459	0.00087	0.07482	0.00053	0.56317	0.01002	0.02354	0.00034		395.5	35.2	465.1	3.2
#47a-17.2	427.8	177.8	28.4	0.089912	0.107	0.4265		0.05733	0.00028	0.07681	0.0004	0.60721	0.00432	0.02427	0.00018		504.3	10.6	477.1	2.4	481.8	2.7	1	484.6	3.5		0.07673	0.00044	0.02425	0.00018		476.6	2.6	484.2	3.5		0.0566	0.00098	0.07674	0.00041	0.59889	0.01107	0.02392	0.00043		475.9	38	476.6	2.4
#47a-2.2	199	84.4	13.9	0.143858	0.527	0.4351		0.05981	0.00087	0.08096	0.00105	0.66757	0.01303	0.02706	0.00043		596.7	31.2	501.9	6.3	519.2	7.9	3.4	539.6	8.4		0.08068	0.00116	0.027	0.00041		500.2	6.9	538.5	8		0.05864	0.00128	0.08084	0.00105	0.6537	0.0168	0.0265	0.00046		553.9	47	501.2	6.3
#47a-4.2	315.9	95.4	22.2	0.93508	0.88	0.31		0.06307	0.00051	0.08136	0.0021	0.70749	0.01914	0.02987	0.00138		710.7	17	504.2	12.5	543.3	11.5	7.2	594.8	27.1		0.08073	0.00216	0.02974	0.00139		500.5	12.9	592.2	27.2		0.05546	0.0007	0.0806	0.00208	0.61639	0.01785	0.0247	0.0011		431.1	27.8	499.7	12.4
#47a-16.1	335.5	153.7	25.2	0.017982	0.375	0.4699		0.05943	0.00062	0.08676	0.0009	0.71097	0.01044	0.02824	0.00061		582.9	22.4	536.3	5.3	545.3	6.2	1.6	562.8	12		0.0866	0.00098	0.02822	0.0006		535.4	5.8	562.4	11.7		0.05928	0.00113	0.08674	0.0009	0.70907	0.01557	0.02817	0.00058		577.5	40.8	536.3	5.4
#47a-31.2	384.1	54.5	33.4	0.251752	1.836	0.1454		0.07235	0.00038	0.10044	0.001	1.00191	0.01129	0.05694	0.00103		995.9	10.6	617	5.9	704.8	5.8	12.4	1119.2	19.7		0.09885	0.00107	0.0573	0.00107		607.7	6.3	1126.1	20.4		0.07034	0.00073	0.10019	0.001	0.9717	0.01447	0.05331	0.00132		938.3	21.2	615.5	5.8
#47a-23.2	650.3	30.4	60.7	0.089912	0.002	0.0479		0.06408	0.00102	0.1079	0.00076	0.95341	0.01664	0.03336	0.00126		744.3	33.2	660.5	4.4	679.9	8.7	2.8	663.2	24.6		0.10753	0.00091	0.03325	0.00124		658.4	5.3	661.1	24.2		0.06336	0.00112	0.1078	0.00076	0.94174	0.0183	0.02911	0.0028		720.3	37.2	660	4.4
#47a-3.1	325.7	236.7	33.5	0.071929	0.018	0.7456		0.06262	0.00026	0.11885	0.00153	1.02615	0.01386	0.03652	0.00054		695.3	8.8	723.9	8.8	717	7	-1	724.9	10.5		0.11896	0.00161	0.03656	0.00054		724.6	9.3	725.7	10.5		0.06204	0.0003	0.11877	0.00153	1.01594	0.01446	0.03628	0.00024		675.5	10.4	723.5	8.9
#47a-5.2	911.7	101.9	98	0.161841	0.325	0.1146		0.07284	0.00043	0.12423	0.00179	1.24774	0.01947	0.04529	0.00128		1009.5	12	754.9	10.3	822.4	8.8	8.2	895.2	24.8		0.12282	0.0019	0.04505	0.0013		746.8	10.9	890.5	25		0.07155	0.00053	0.12403	0.00179	1.22364	0.02033	0.04166	0.00136		973.1	15.2	753.7	10.2
#47a-6.2	65.5	35.8	12.8	0.665345	1.43	0.5614		0.09386	0.00062	0.22682	0.00264	2.93525	0.03932	0.07855	0.00128		1505.3	12.4	1317.8	13.9	1391	10.1	5.2	1528.2	24		0.22396	0.00299	0.07868	0.00136		1302.8	15.8	1530.7	25.4		0.08868	0.00198	0.22544	0.00266	2.75634	0.07026	0.07313	0.00194		1397.1	42.2	1310.5	14
#47a-25.2	202.8	82.8	52.4	0.179823	0.109	0.419		0.10411	0.00082	0.29873	0.00256	4.28823	0.05007	0.08848	0.00095		1698.7	14.4	1685	12.7	1691.1	9.7	0.4	1713.5	17.7		0.29836	0.00324	0.0886	0.00098		1683.2	16.1	1715.6	18.2		0.10274	0.00094	0.29826	0.00256	4.22495	0.05524	0.08595	0.00084		1674.1	17	1682.7	12.8
[truncated: 18 more columns]

## Sheet: Sample #39
	Conc. (ppm)							Isotope ratios, uncorrected									Ages (Ma), uncorrected										Isotope ratios, 207Pb corrected					Ages (Ma), 207Pb corrected					Isotope ratios, 204Pb corrected									Ages (Ma), 204Pb corrected
Spot	U	Th	206Pb (ppm)	f206% (204)	f206% (208)	232Th/235U		207Pb/206Pb	±err	206Pb/238U	±err	207Pb/235U	±err	208Pb/232Th	±err		207Pb/206Pb	±err	206Pb/238U	±err	207Pb/235U	±err	d(%)	208Pb/232Th	±err		206Pb/238U	±err	208Pb/232Th	±err		206Pb/238U	±err	208Pb/232Th	±err		207Pb/206Pb	±err	206Pb/238U	±err	207Pb/235U	±err	208Pb/232Th	±err		207Pb/206Pb	±err	206Pb/238U	±err
Sample #39 (n=27)
#39-15.1	367.4	3.1	6	0.035965	0.427	0.0087		0.05013	0.00123	0.01881	0.00043	0.13001	0.00433	0.02512	0.00827		201.1	56	120.1	2.7	124.1	3.9	3.2	501.4	163.7		0.01876	0.00046	0.02535	0.00849		119.8	2.9	506	166.7		0.04984	0.00146	0.0188	0.00043	0.1292	0.00482	0.02356	0.00924		187.3	66.8	120.1	2.7
#39-R11.1	369	6.7	6.1	0.557451	1.01	0.0186		0.05581	0.00063	0.01914	0.00046	0.1473	0.00391	0.02773	0.00091		444.9	24.8	122.2	2.9	139.5	3.4	12.4	552.8	17.9		0.01895	0.00047	0.02783	0.0009		121	3	554.8	17.8		0.05125	0.00089	0.01903	0.00046	0.13447	0.00402	0.01539	0.0017		252.1	39.8	121.5	2.9
#39-R6.1	592.7	8.2	9.8	0.449558	0.755	0.0142		0.05453	0.00074	0.01911	0.00115	0.14369	0.00886	0.02725	0.00287		393.1	30	122	7.2	136.3	7.9	10.4	543.4	56.6		0.01895	0.00116	0.02738	0.00291		121	7.4	546	57.2		0.05085	0.00097	0.01902	0.00114	0.13337	0.00844	0.01425	0.00313		234.1	43.6	121.5	7.3
#39-2.1	168.5	1.2	2.9	0.215788	0.33	0.0071		0.05025	0.00026	0.01996	0.00022	0.13829	0.00168	0.02583	0.00483		206.5	12	127.4	1.4	131.5	1.5	3.2	515.4	95.4		0.01991	0.00024	0.02608	0.00497		127.1	1.5	520.3	97.6		0.04848	0.00159	0.01992	0.00022	0.13312	0.00465	0.01263	0.01185		122.7	75.6	127.1	1.4
#39-R3.1	372.1	4.2	6.6	0.341664	0.967	0.0116		0.05596	0.00094	0.02053	0.00068	0.15838	0.00589	0.04237	0.00285		450.7	37	131	4.3	149.3	5.2	12.2	838.7	55.4		0.02032	0.00069	0.04288	0.00285		129.7	4.4	848.6	55.1		0.05317	0.00113	0.02046	0.00068	0.14998	0.00593	0.0292	0.00352		336.1	47.8	130.5	4.2
#39-R16.1	117.7	0.7	2.1	2.71533	1.335	0.0062		0.06308	0.00226	0.02068	0.00058	0.17985	0.00818	0.09932	0.01012		710.9	74.4	132	3.7	167.9	7	21.4	1913.7	186.9		0.02029	0.00063	0.09986	0.01013		129.5	4	1923.6	185.2		0.04057	0.00293	0.0201	0.00057	0.11244	0.00871	-0.09511	-0.01681				128.3	3.6
#39-R14.1	312.3	4.1	5.7	0.125876	0.345	0.0136		0.04797	0.00081	0.02116	0.00042	0.13999	0.00365	0.0179	0.00154		0	137.3	135	2.7	133	3.2	-1.6	358.6	30.6		0.02118	0.00045	0.01803	0.00155		135.1	2.9	361.2	30.7		0.04693	0.00087	0.02113	0.00042	0.13676	0.00375	0.01369	0.00189				134.8	2.6
#39-R15.1	355.7	6.6	6.9	0.593416	1.54	0.019		0.06086	0.00107	0.02247	0.00045	0.18851	0.00504	0.04507	0.00174		634.3	37.4	143.2	2.8	175.4	4.4	18.4	890.9	33.6		0.02211	0.00047	0.04555	0.00176		141	3	900.2	34.1		0.05604	0.00143	0.02233	0.00045	0.17255	0.00564	0.03	0.00299		453.9	55.8	142.4	2.8
#39-R4.1	180.4	11.3	3.5	0.899115	1.769	0.0641		0.05974	0.00395	0.02263	0.00062	0.18636	0.01333	0.0201	0.00339		594.1	137.2	144.3	4	173.5	11.5	16.8	402.2	67.3		0.02232	0.00074	0.01997	0.0033		142.3	4.7	399.6	65.3		0.0524	0.00404	0.02242	0.00061	0.16197	0.01326	0.01327	0.00337		302.9	166.6	142.9	3.8
#39-13.1	270.7	85.4	5.5	0.773239	6.027	0.3235		0.09415	0.00204	0.02364	0.0005	0.30682	0.00926	0.01623	0.00063		1511.1	40.4	150.6	3.1	271.7	7.2	44.6	325.4	12.6		0.02227	0.00053	0.01537	0.00056		142	3.3	308.2	11.1		0.08812	0.00352	0.02345	0.0005	0.28494	0.01296	0.01502	0.00071		1385.1	74.8	149.4	3.1
#39-R13.1	224.3	5.8	4.5	0.809204	3.016	0.0263		0.07199	0.00076	0.02342	0.00067	0.2325	0.00711	0.06322	0.00448		985.7	21.4	149.2	4.2	212.3	5.9	29.8	1238.9	85.3		0.02271	0.00066	0.06374	0.00448		144.8	4.2	1248.8	85		0.06549	0.00148	0.02322	0.00067	0.20971	0.00769	0.04786	0.00482		790.1	46.8	148	4.2
#39-21.1	155.2	1.7	3.8	31.3611	0.621	0.0113		0.05778	0.00185	0.02809	0.00045	0.2238	0.00802	0.04104	0.0026		521.5	68.6	178.6	2.8	205.1	6.7	13	812.9	50.6		0.02779	0.00052	0.04151	0.00261		176.7	3.2	821.9	50.7				0.01897	0.00172								121.1	10.9
#39-R9.1	522	37	13	0.143858	0.788	0.0727		0.05194	0.00063	0.02878	0.00064	0.2061	0.00524	0.01555	0.00104		282.7	27.6	182.9	4	190.3	4.4	3.8	311.8	20.7		0.02868	0.00065	0.01556	0.00104		182.3	4.1	312	20.7		0.05076	0.0007	0.02874	0.00064	0.20114	0.00532	0.01432	0.00102		230.1	31.8	182.6	4
#39-13.2	708.5	483.7	22.6	0	-0.255	0.7004		0.05078	0.00021	0.03693	0.00036	0.25857	0.00275	0.01138	0.00017		230.9	9.4	233.8	2.3	233.5	2.2	-0.2	228.7	3.4		0.03693	0.00038	0.01138	0.00017		233.8	2.4	228.6	3.4		0.05078	0.00021	0.03693	0.00036	0.25857	0.00289	0.01138	0.00011		230.9	9.4	233.8	2.3
#39-17.1	158.1	127.8	5.2	0.197805	-0.166	0.8289		0.05219	0.00034	0.03765	0.00062	0.27097	0.00477	0.01172	0.00028		293.7	14.8	238.3	3.9	243.5	3.8	2.2	235.5	5.6		0.03759	0.00064	0.0117	0.00027		237.9	4	235.1	5.5		0.05057	0.00161	0.03757	0.00062	0.26199	0.00944	0.01153	0.00027		221.3	72	237.8	3.9
#39-R8.1	962.1	38.5	33.6	0.161841	0.331	0.0411		0.05699	0.00044	0.04033	0.0012	0.3169	0.00971	0.01944	0.00077		491.1	17	254.9	7.5	279.5	7.5	8.8	389.1	15.3		0.04003	0.00122	0.01937	0.00077		253	7.6	387.8	15.2		0.05567	0.00047	0.04026	0.0012	0.30907	0.00962	0.01605	0.00062		439.3	18.6	254.5	7.5
#39-3.2	388	324.1	13.8	0	-0.67	0.8569		0.05089	0.00112	0.0411	0.00052	0.28836	0.00732	0.01235	0.00021		235.9	50	259.6	3.2	257.3	5.8	-0.8	248.1	4.2		0.04111	0.00058	0.01235	0.00019		259.7	3.6	248.1	3.9		0.05089	0.00113	0.0411	0.00052	0.28839	0.00745	0.01234	0.00014		235.9	50.4	259.6	3.2
#39-6.2	995.5	506.9	37.4	0.161841	-0.138	0.5224		0.0531	0.0006	0.04336	0.00063	0.31749	0.00581	0.01341	0.00021		333.1	25.4	273.6	3.9	280	4.5	2.2	269.2	4.2		0.04327	0.00066	0.01338	0.00021		273.1	4.1	268.6	4.1		0.05178	0.00062	0.04329	0.00063	0.30904	0.00593	0.01312	8e-05		275.7	27.2	273.2	3.9
#39-2.2	173.6	102.4	8.4	0.611398	0.786	0.6051		0.06034	0.00111	0.05597	0.00043	0.46567	0.00933	0.01891	0.00027		615.9	39.2	351.1	2.7	388.2	6.5	9.6	378.6	5.4		0.05547	0.00052	0.01876	0.00024		348	3.2	375.6	4.8		0.05537	0.00247	0.05562	0.00045	0.42462	0.01935	0.01771	0.00055		427.1	96.6	349	2.8
#39-1.1	330.2	155.6	18.2	0.017982	0.345	0.4834		0.05494	0.00035	0.06354	0.00126	0.48131	0.01005	0.02073	0.00045		409.7	14.2	397.1	7.6	399	6.9	0.4	414.7	8.9		0.0635	0.00131	0.02073	0.00044		396.9	7.9	414.7	8.8		0.05479	0.00115	0.06353	0.00126	0.47996	0.01399	0.02067	0.00038		403.9	46.2	397	7.6
#39-20.1	539	22.3	31.6	0.161841	0.004	0.0425		0.05699	0.00017	0.06781	0.0009	0.53288	0.00722	0.02129	0.00064		491.1	6.6	422.9	5.4	433.7	4.8	2.4	425.8	12.7		0.06763	0.00091	0.02124	0.00064		421.9	5.5	424.8	12.7		0.05567	0.0005	0.0677	0.0009	0.51969	0.00854	0.01581	0.0019		439.5	19.8	422.3	5.5
#39-21.2	499.3	18.2	30.4	0.053947	0.073	0.0374		0.05647	0.00064	0.07044	0.00035	0.54838	0.00683	0.02481	0.00101		470.9	24.8	438.8	2.1	443.9	4.5	1.2	495.3	19.9		0.07035	0.00042	0.02483	0.001		438.3	2.5	495.7	19.8		0.05603	0.00155	0.0704	0.00037	0.5439	0.01543	0.02266	0.00652		453.7	60.2	438.6	2.2
#39-4.2	367.8	246.8	24.4	0.107894	0.127	0.6884		0.05796	0.00046	0.07652	0.00064	0.61157	0.00708	0.02406	0.00025		528.3	17.2	475.3	3.8	484.5	4.4	1.8	480.5	4.9		0.07637	0.00069	0.02402	0.00024		474.4	4.1	479.7	4.7		0.05708	0.00091	0.07644	0.00064	0.60162	0.01105	0.02381	0.00025		494.9	34.6	474.8	3.8
#39-16.2	417.9	208.6	29.6	0.035965	-0.191	0.5121		0.05813	0.00049	0.08186	0.00142	0.65606	0.01265	0.02483	0.0006		534.7	18.4	507.2	8.5	512.2	7.8	1	495.7	11.8		0.08177	0.00148	0.0248	0.00059		506.7	8.9	495	11.7		0.05784	0.00051	0.08183	0.00142	0.65258	0.01294	0.0247	0.00039		523.7	19.4	507	8.4
#39-14.1	247.5	52.9	21.6	0.089912	2.85	0.2192		0.08321	0.00049	0.10103	0.00163	1.15909	0.01992	0.05777	0.0015		1274.1	11.6	620.4	9.5	781.5	9.4	20.6	1135.1	28.7		0.09799	0.00167	0.05731	0.00154		602.6	9.8	1126.3	29.4		0.0825	0.00106	0.10094	0.00163	1.14825	0.02408	0.0569	0.00121		1257.5	25	619.9	9.5
#39-9.1	129.7	82.4	18.5	0.125876	-0.076	0.6519		0.07264	0.00043	0.16498	0.00264	1.65227	0.02823	0.04955	0.00083		1003.9	12	984.4	14.6	990.4	10.8	0.6	977.4	16		0.16482	0.00286	0.04948	0.00084		983.5	15.8	976.1	16.2		0.07164	0.00064	0.16478	0.00264	1.62763	0.03037	0.04889	0.00031		975.7	18	983.3	14.6
#39-18.2	107.3	112.4	17.8	-0.179823	0.001	1.0742		0.0756	0.00055	0.1918	0.00172	1.99921	0.02314	0.05757	0.00063		1084.5	14.6	1131.1	9.3	1115.2	7.8	-1.4	1131.2	12		0.19226	0.00196	0.05771	0.00063		1133.6	10.6	1133.9	12		0.07702	0.00095	0.19212	0.00173	2.04032	0.03205	0.05822	0.00048		1121.7	24.6	1132.9	9.4
[truncated: 18 more columns]

## Sheet: Sample #43
	Conc. (ppm)							Isotope ratios, uncorrected									Ages (Ma), uncorrected										Isotope ratios, 207Pb corrected					Ages (Ma), 207Pb corrected					Isotope ratios, 204Pb corrected									Ages (Ma), 204Pb corrected
Spot	U	Th	206Pb (ppm)	f206% (204)	f206% (208)	232Th/235U		207Pb/206Pb	±err	206Pb/238U	±err	207Pb/235U	±err	208Pb/232Th	±err		207Pb/206Pb	±err	206Pb/238U	±err	207Pb/235U	±err	d(%)	208Pb/232Th	±err		206Pb/238U	±err	208Pb/232Th	±err		206Pb/238U	±err	208Pb/232Th	±err		207Pb/206Pb	±err	206Pb/238U	±err	207Pb/235U	±err	208Pb/232Th	±err		207Pb/206Pb	±err	206Pb/238U	±err
Sample #43 (n=53)
#43-8.1	724	496.9	8.3	0.373	-0.451	0.7041		0.04807	0.00018	0.01321	0.00019	0.08753	0.00128	0.00404	7e-05		102.9	8.6	84.58	1.19	85.2	1.19	0.8	81.4	1.42		0.01319	0.00019	0.00403	7e-05		84.47	1.19	81.31	1.41		0.04487	0.00093	0.01315	0.00019	0.08137	0.00206	0.00388	6e-05				84.24	1.19
#43-14.1	376	182.9	4.7	1.211	1.081	0.499		0.05195	0.00073	0.01441	0.0003	0.10318	0.0026	0.00518	0.00014		283.1	31.8	92.2	1.92	99.71	2.4	7.6	104.33	2.89		0.01433	0.00032	0.00515	0.00014		91.69	2.01	103.74	2.79		0.04151	0.00289	0.01422	0.0003	0.08137	0.00593	0.00439	0.00022				91	1.91
#43-38.1	588.2	444.2	7.8	0	-0.326	0.7747		0.04798	0.00109	0.01532	0.00024	0.10137	0.00284	0.00474	0.00015		0	151.3	98	1.5	98	2.6	0	95.6	3		0.0153	0.00025	0.00474	0.00015		97.9	1.6	95.5	3		0.04798	0.0011	0.01532	0.00024	0.10137	0.00285	0.00474	0.00013			151.7	98	1.5
#43-35.1	371.5	224	5.3	0	0.36	0.6186		0.05343	0.00125	0.01652	0.00028	0.12172	0.00356	0.00542	0.00015		347.1	52	105.6	1.8	116.6	3.2	9.4	109.3	2.9		0.01639	0.00029	0.00538	0.00014		104.8	1.9	108.5	2.7		0.05343	0.00125	0.01652	0.00028	0.12172	0.00356	0.00542	0.00011		347.1	52	105.6	1.8
#43-32.1	163.5	104.3	2.5	1.689	0.067	0.6546		0.05348	0.00124	0.01732	0.00033	0.12774	0.00384	0.00553	0.00014		349.3	51.6	110.72	2.09	122.07	3.47	9.2	111.38	2.81		0.0172	0.00035	0.00549	0.00013		109.92	2.2	110.58	2.63		0.03887	0.00454	0.01701	0.00034	0.09115	0.0108	0.00453	0.00029				108.72	2.13
#43-21.1	499.3	315.7	16.7	0.394	0.608	0.6486		0.05304	0.00057	0.03853	0.00053	0.28181	0.00492	0.01282	0.00025		330.5	24.2	243.74	3.3	252.09	3.91	3.4	257.36	4.9		0.03842	0.00055	0.01279	0.00024		243.04	3.41	256.76	4.71		0.04968	0.00139	0.03837	0.00053	0.26282	0.00826	0.01229	0.00022		179.9	63.8	242.74	3.31
#43-29.1	317.1	299.3	10.9	0.258	0.614	0.9684		0.05381	0.00109	0.03974	0.00046	0.29485	0.00691	0.01296	0.00017		363.3	45.2	251.21	2.87	262.37	5.43	4.2	260.21	3.45		0.03959	0.00051	0.01292	0.00015		250.31	3.17	259.41	3.04		0.05162	0.00205	0.03963	0.00047	0.28207	0.01173	0.01272	0.00018		268.7	88.6	250.53	2.9
#43-53.1	927.9	53.4	32.1	0.106	-0.018	0.059		0.05087	0.00032	0.04002	0.00062	0.28072	0.00478	0.01234	0.00036		234.9	14.6	253	3.8	251.2	3.8	-0.8	247.8	7.2		0.04004	0.00065	0.01234	0.00036		253.1	4	247.8	7.3		0.04995	0.00075	0.03998	0.00062	0.27531	0.00599	0.01071	0.00116		192.5	34.4	252.7	3.8
#43-12.1	955.4	547.5	33.7	0.378	0.179	0.5879		0.05144	0.00026	0.04072	0.0007	0.2888	0.00514	0.01305	0.00024		260.3	11.6	257.31	4.31	257.62	4.06	0.2	262.02	4.84		0.0407	0.00071	0.01305	0.00024		257.2	4.4	262.02	4.74		0.0482	0.00082	0.04056	0.00069	0.26956	0.00657	0.01247	0.00016		109.3	39.6	256.3	4.3
#43-31.1	305.8	294.9	11	1.687	0.703	0.9892		0.0514	0.00033	0.04157	0.00055	0.2946	0.00435	0.0136	0.00026		258.9	14.6	262.53	3.43	262.17	3.42	-0.2	273.04	5.23		0.04156	0.00059	0.01361	0.00026		262.52	3.62	273.15	5.11		0.03678	0.00761	0.04082	0.00065	0.20701	0.04294	0.01203	0.0008				257.91	4.06
#43-1.1	332.3	257.8	12	0.235	-0.03	0.7958		0.05185	0.00026	0.04185	0.00036	0.29921	0.00301	0.01313	0.00023		278.9	11.6	264.29	2.25	265.78	2.35	0.6	263.71	4.62		0.04182	0.00038	0.01312	0.00023		264.09	2.36	263.51	4.61		0.04985	0.00095	0.04174	0.00037	0.28693	0.00612	0.01286	0.00023		188.1	43.8	263.64	2.26
#43-42.1	1705.5	33.8	62.4	0.551	0.735	0.0203		0.05687	0.0005	0.04225	0.00039	0.33129	0.0044	0.04508	0.00338		486.3	19.4	266.8	2.4	290.6	3.4	8.2	891.2	65.5		0.04196	0.00042	0.0456	0.00338		265	2.6	901.1	65.2		0.05209	0.00072	0.042	0.00039	0.30165	0.00511	0.01918	0.00398		289.3	31	265.2	2.4
#43-49.1	826.2	715	30.3	0.059	-0.153	0.8877		0.05183	0.00085	0.04235	0.00054	0.30268	0.00636	0.01319	0.00018		278.1	37	267.4	3.3	268.5	5	0.4	264.8	3.6		0.04233	0.00059	0.01318	0.00017		267.3	3.6	264.6	3.3		0.05132	0.0009	0.04233	0.00054	0.2995	0.00657	0.01312	5e-05		255.3	39.8	267.2	3.3
#43-20.1	1300.9	112.6	48	0.18	-0.072	0.0888		0.05082	0.00018	0.04263	0.0009	0.29866	0.00642	0.01269	0.0003		232.5	8	269.09	5.6	265.35	5.03	-1.4	254.89	6.07		0.04266	0.00092	0.0127	0.0003		269.29	5.7	254.99	6.06		0.04928	0.00027	0.04254	0.0009	0.28905	0.00642	0.01077	0.00027		161.1	12.8	268.58	5.58
#43-53.2	126.6	101.2	4.7	0.085	-0.505	0.8197		0.05194	0.00165	0.04269	0.00073	0.3057	0.01106	0.01294	0.00046		282.7	70.8	269.5	4.5	270.8	8.6	0.4	259.9	9.2		0.04266	0.00081	0.01293	0.00043		269.3	5	259.7	8.6		0.0512	0.00165	0.04265	0.00073	0.3011	0.01106	0.01284	0.0004		249.9	72.8	269.2	4.5
#43-27.1	904.2	815	34.2	0.049	0.041	0.9247		0.05219	0.00033	0.0437	0.00063	0.31444	0.00494	0.01377	0.00022		293.9	14.4	275.7	3.88	277.62	3.82	0.6	276.38	4.33		0.04366	0.00064	0.01376	0.00021		275.5	3.98	276.18	4.24		0.05178	0.00055	0.04367	0.00063	0.31179	0.00569	0.01372	0.0001		275.7	24.2	275.56	3.88
#43-43.1	894.8	767.5	34.2	0.086	-0.118	0.88		0.05347	0.00059	0.04419	0.00071	0.32576	0.00647	0.01378	0.00036		348.7	24.8	278.7	4.4	286.3	4.9	2.6	276.6	7.2		0.04408	0.00074	0.01375	0.00035		278.1	4.6	276	7		0.05273	0.00073	0.04415	0.00071	0.32094	0.00694	0.01368	0.00028		317.1	31.4	278.5	4.4
#43-7.1	431.3	195.4	17.1	0.082	0.257	0.4647		0.05272	0.00051	0.0457	0.00055	0.33221	0.00512	0.01485	0.00024		316.9	21.8	288.07	3.39	291.25	3.91	1	297.86	4.79		0.04565	0.00058	0.01484	0.00023		287.77	3.6	297.66	4.59		0.05202	0.0009	0.04566	0.00055	0.32753	0.00701	0.01467	0.00024		286.5	39	287.83	3.4
#43-10.1	1726.1	133.6	72.4	0.021	-0.003	0.0794		0.05178	0.00017	0.04848	0.00087	0.34615	0.00631	0.01518	0.00038		275.7	7.6	305.2	5.34	301.82	4.77	-1.2	304.48	7.62		0.04851	0.00088	0.01519	0.00038		305.4	5.44	304.68	7.63		0.0516	0.00034	0.04847	0.00087	0.34486	0.00669	0.01489	0.0005		267.7	14.8	305.14	5.35
#43-5.1	208	144	10	0	0.067	0.7104		0.0527	0.00062	0.05564	0.00048	0.40431	0.00588	0.01752	0.00022		315.9	26.4	349.06	2.92	344.77	4.26	-1.2	351.02	4.31		0.05569	0.00053	0.01754	0.00021		349.36	3.23	351.32	4.11		0.0527	0.00062	0.05564	0.00048	0.40431	0.00606	0.01752	0.00014		315.9	26.4	349.06	2.92
#43-37.1	317.4	206.6	15.2	0	-0.621	0.6677		0.05335	0.00011	0.05535	0.00089	0.40716	0.00674	0.01636	0.0003		343.7	4.6	347.3	5.4	346.8	4.8	-0.2	328	6		0.05535	0.0009	0.01635	0.00031		347.3	5.5	327.8	6.1		0.05335	0.00011	0.05535	0.00089	0.40716	0.00674	0.01636	0.00014		343.7	4.6	347.3	5.4
#43-44.1	234.4	499.3	11.7	-0.212	1.455	2.1847		0.05854	0.00055	0.05752	0.00086	0.46426	0.00837	0.01854	0.00032		549.9	20.6	360.5	5.2	387.2	5.8	6.8	371.3	6.5		0.05715	0.0009	0.01843	0.00031		358.3	5.5	369.1	6.2		0.06036	0.00114	0.05765	0.00086	0.47977	0.01172	0.01867	0.00017		616.5	40.4	361.3	5.2
#43-50.1	543.3	51.8	27.1	0.23	0.556	0.0978		0.0556	0.00062	0.05767	0.00167	0.44205	0.01382	0.02479	0.00108		436.3	24.6	361.4	10.2	371.7	9.8	2.8	494.9	21.3		0.05751	0.00172	0.02484	0.00108		360.5	10.5	495.8	21.3		0.05361	0.00074	0.05752	0.00167	0.4252	0.01375	0.02174	0.00097		354.7	31	360.5	10.1
#43-24.1	257.2	168.6	13.2	0.546	0.004	0.6726		0.05372	0.00072	0.05909	0.00055	0.43765	0.00713	0.01849	0.00021		359.1	30	370.1	3.34	368.59	5.05	-0.4	370.24	4.14		0.05911	0.00061	0.01849	0.00019		370.2	3.74	370.35	3.83		0.04905	0.00105	0.05875	0.00055	0.39735	0.00942	0.01743	0.00019		150.3	49.6	368.02	3.33
#43-56.1	670.7	10.6	34.7	0.281	0.208	0.0163		0.06146	0.00094	0.05974	0.00164	0.50624	0.01603	0.03461	0.001		655.3	32.8	374	9.9	415.9	10.8	10	687.6	19.6		0.05916	0.00171	0.03465	0.00099		370.5	10.4	688.4	19.3		0.05904	0.00119	0.05956	0.00164	0.48483	0.01662	0.01135	0.00645		568.5	43.4	372.9	9.9
#43-48.1	622.2	74.4	32.3	0.109	-0.224	0.1227		0.05471	0.00031	0.06002	0.00073	0.45282	0.0063	0.01652	0.00024		400.5	12.8	375.8	4.5	379.3	4.5	1	331.2	4.7		0.05998	0.00077	0.01648	0.00023		375.5	4.7	330.4	4.6		0.05377	0.0005	0.05995	0.00073	0.44446	0.00701	0.01532	0.00048		361.3	21	375.3	4.4
#43-4.1	581.8	62.8	30.4	0.08	-0.041	0.1107		0.05421	0.0008	0.06045	0.00247	0.45185	0.01963	0.01844	0.00288		379.9	33	378.37	15.03	378.57	13.82	0	369.23	57.15		0.06043	0.00255	0.01843	0.00289		378.26	15.52	369.04	57.29		0.05353	0.00091	0.0604	0.00247	0.4458	0.01979	0.01747	0.00275		351.3	38	378.06	15.02
#43-18.1	278.1	215.7	14.7	0.119	-0.274	0.7958		0.0563	0.00088	0.0612	0.00086	0.47505	0.01	0.01874	0.00034		464.1	34.4	382.92	5.22	394.67	6.91	3	375.21	6.82		0.06103	0.00094	0.01868	0.00032		381.92	5.73	374.11	6.43		0.05528	0.00236	0.06112	0.00087	0.46593	0.02104	0.01854	0.00045		423.7	92.6	382.45	5.3
#43-11.1	673.2	247.3	36.2	0.075	0.079	0.3768		0.0536	0.00029	0.06218	0.00057	0.45951	0.00486	0.01968	0.00028		354.3	12	388.85	3.44	383.92	3.39	-1.2	393.93	5.65		0.06224	0.0006	0.0197	0.00029		389.24	3.64	394.33	5.65		0.05296	0.00051	0.06213	0.00057	0.45367	0.00624	0.01941	0.00022		327.1	21.8	388.55	3.44
#43-55.1	294.8	216.6	15.9	0.13	-0.321	0.7536		0.05436	0.00042	0.06244	0.00062	0.46804	0.0061	0.01901	0.00026		386.1	17.2	390.5	3.8	389.8	4.2	-0.2	380.7	5.1		0.06245	0.00066	0.01901	0.00024		390.5	4	380.6	4.9		0.05323	0.00078	0.06235	0.00062	0.45768	0.00828	0.01877	0.00022		338.9	32.8	389.9	3.7
#43-9.1	238	93.6	13.6	0.501	0.027	0.4036		0.05586	0.00136	0.06594	0.001	0.50779	0.01452	0.02066	0.00036		446.7	53	411.62	6.03	416.97	9.83	1.2	413.32	7.16		0.06585	0.00113	0.02064	0.00033		411.11	6.82	412.83	6.54		0.05159	0.00157	0.06559	0.00099	0.46658	0.01593	0.01886	0.00035		267.5	68.2	409.52	6.01
#43-3.1	331.2	184.1	20.4	0.146	0.243	0.5702		0.05698	0.00094	0.07109	0.00118	0.55858	0.01302	0.02273	0.00042		490.9	35.8	442.74	7.09	450.6	8.52	1.8	454.19	8.25		0.07098	0.00128	0.0227	0.0004		442.04	7.69	453.6	7.85		0.05574	0.0011	0.07098	0.00118	0.54558	0.01417	0.02233	0.00021		442.1	43.2	442.08	7.08
#43-46.1	393	59.1	24.5	0.091	0.081	0.1542		0.05605	0.00071	0.07207	0.00134	0.55698	0.0127	0.02322	0.00082		454.5	27.8	448.6	8.1	449.6	8.4	0.2	463.9	16.3		0.07205	0.00143	0.02322	0.00081		448.5	8.6	464	16.1		0.05527	0.00084	0.072	0.00134	0.54868	0.01338	0.02227	0.00087		423.3	33.6	448.2	8.1
#43-13.1	159.8	87	10.1	0.376	-0.063	0.5582		0.05722	0.0005	0.07334	0.00125	0.57864	0.01107	0.02267	0.00043		500.1	19.2	456.24	7.5	463.58	7.14	1.6	453.1	8.52		0.07322	0.00131	0.02263	0.00043		455.54	7.91	452.3	8.43		0.05403	0.00079	0.07305	0.00124	0.54421	0.01238	0.02159	0.00026		372.3	32.8	454.5	7.47
#43-17.1	403.6	168.4	26.1	0.191	-0.087	0.4281		0.0544	0.00069	0.07478	0.00092	0.56094	0.0099	0.02297	0.00043		387.7	28.4	464.89	5.5	452.14	6.47	-2.8	459.05	8.45		0.07496	0.001	0.02302	0.00041		465.99	6	460.05	8.14		0.05278	0.00106	0.07463	0.00092	0.54314	0.01293	0.02224	0.00046		319.5	45	464	5.51
#43-28.1	689.4	359.1	44.7	0.156	-0.126	0.5344		0.05532	0.00031	0.07491	0.00106	0.57138	0.00866	0.02297	0.00035		425.3	12.2	465.66	6.34	458.91	5.61	-1.4	458.93	6.95		0.07499	0.00109	0.02299	0.00035		466.15	6.54	459.33	6.96		0.05399	0.00059	0.07479	0.00106	0.55678	0.01016	0.02249	0.0002		370.9	24.4	464.93	6.34
#43-6.1	213.9	117.3	14.2	0.102	0.069	0.5627		0.05721	0.00072	0.07643	0.00102	0.60286	0.01107	0.02395	0.00046		499.7	27.6	474.75	6.09	479.05	7.04	0.8	478.29	9.1		0.07636	0.0011	0.02393	0.00045		474.35	6.6	477.9	8.79		0.05635	0.00093	0.07634	0.00102	0.59318	0.01279	0.02365	0.00038		466.3	36.2	474.27	6.1
#43-51.1	276.2	161.1	18.4	0.194	-0.483	0.5984		0.0579	0.00014	0.07696	0.00101	0.61442	0.00848	0.02275	0.0004		526.1	5.2	478	6.1	486.3	5.3	1.8	454.6	8		0.07683	0.00105	0.02269	0.0004		477.2	6.3	453.5	8		0.05622	0.00117	0.0768	0.00101	0.59537	0.01482	0.02219	0.00044		461.3	45.4	477	6.1
#43-16.1	316.3	40.4	22.7	0.043	0.068	0.1309		0.05737	0.00071	0.08297	0.0009	0.6563	0.01084	0.02663	0.00039		505.7	27	513.85	5.38	512.35	6.67	-0.2	531.22	7.6		0.08299	0.001	0.02665	0.00037		513.94	5.97	531.63	7.28		0.057	0.00081	0.08294	0.0009	0.65186	0.01192	0.02604	0.00063		491.7	31.2	513.63	5.38
#43-19.1	120.3	89.7	8.9	0.194	-0.094	0.7645		0.05919	0.00023	0.08574	0.00151	0.69975	0.01258	0.02639	0.00061		574.1	8.2	530.32	8.95	538.64	7.54	1.6	526.47	12.08		0.08561	0.00156	0.02635	0.00061		529.52	9.25	525.57	12.08		0.05755	0.00179	0.08557	0.00151	0.67899	0.02439	0.02592	0.00059		512.5	67	529.3	8.99
#43-22.1	538.9	252.7	40.7	0.276	0.006	0.4809		0.05766	0.00062	0.08725	0.00124	0.69364	0.01232	0.02706	0.0004		516.9	23.4	539.23	7.33	534.98	7.41	-0.8	539.67	7.81		0.0873	0.00132	0.02708	0.00038		539.52	7.83	540.08	7.5		0.05532	0.00068	0.087	0.00123	0.66359	0.01271	0.02597	0.00015		425.3	27.4	537.75	7.31
#43-57.1	256.5	223.8	20.8	0.074	-0.196	0.8951		0.06016	0.00061	0.09386	0.00182	0.77864	0.01722	0.02866	0.00061		609.5	21.6	578.3	10.7	584.7	9.9	1	571	11.9		0.09374	0.00191	0.02862	0.00059		577.6	11.3	570.2	11.7		0.05953	0.00092	0.09379	0.00182	0.76978	0.01926	0.02848	0.00029		586.5	33	577.9	10.7
#43-40.1	1261.7	28.6	133.5	0.024	0.102	0.0232		0.06645	0.00044	0.12223	0.00199	1.1199	0.0201	0.0487	0.00127		820.5	13.8	743.4	11.5	762.9	9.6	2.6	961.1	24.6		0.12183	0.00211	0.04901	0.00131		741.1	12.2	967	25.3		0.06625	0.00045	0.1222	0.00199	1.11621	0.02013	0.04594	0.00156		814.3	14.2	743.2	11.4
#43-34.1	202.7	124.7	26	0.066	0.657	0.6311		0.07304	0.00105	0.14795	0.00282	1.48998	0.03561	0.04793	0.00109		1015.1	29	889.45	15.87	926.31	14.63	4	946.12	21.03		0.14707	0.00312	0.04777	0.00106		884.54	17.57	943.03	20.51		0.07249	0.00112	0.14785	0.00282	1.47779	0.03669	0.04759	0.00062		999.7	31.2	888.9	15.87
#43-15.1	222.9	108.6	29.9	0.296	1.434	0.4997		0.08064	0.00117	0.1547	0.00322	1.72022	0.0436	0.05558	0.00141		1212.9	28	927.28	18.01	1016.11	16.41	8.8	1093.25	27.11		0.15245	0.00354	0.05522	0.00139		914.68	19.82	1086.26	26.67		0.07821	0.0018	0.15425	0.00322	1.66326	0.05198	0.05362	0.00128		1152.1	45	924.73	18.01
#43-47.1	349.7	149.5	51.2	-0.031	0.23	0.4386		0.0733	0.00034	0.16921	0.00214	1.71007	0.0238	0.05287	0.00098		1022.1	9.2	1007.8	11.8	1012.3	8.9	0.4	1041.3	18.8		0.16909	0.00232	0.05292	0.00101		1007.1	12.8	1042.2	19.4		0.07356	0.00044	0.16927	0.00214	1.71681	0.02483	0.05314	0.00073		1029.5	12.2	1008.1	11.8
#43-58.1	221.7	86.3	33.5	0	0.149	0.3992		0.07268	0.00026	0.17469	0.0029	1.7506	0.0304	0.05399	0.00124		1005.1	7.2	1037.9	15.9	1027.4	11.3	-1	1062.7	23.9		0.17496	0.0031	0.05415	0.00129		1039.4	17	1065.7	24.8		0.07268	0.00026	0.17469	0.0029	1.7506	0.0304	0.05399	0.00081		1005.1	7.2	1037.9	15.9
#43-33.1	517.7	271.2	81.5	0.174	2.279	0.5374		0.08692	0.00027	0.18196	0.00321	2.18067	0.03908	0.06971	0.00129		1358.7	6	1077.69	17.54	1174.89	12.55	8.2	1361.88	24.31		0.17905	0.00339	0.06972	0.00138		1061.78	18.53	1362.08	25.98		0.0855	0.00033	0.18165	0.00321	2.14148	0.03945	0.06846	0.00039		1326.9	7.4	1076	17.52
#43-23.1	122.5	88	19.1	0.067	0.238	0.7368		0.07661	0.0006	0.18	0.00329	1.9013	0.03776	0.05531	0.00117		1110.9	15.6	1066.98	17.98	1081.54	13.3	1.4	1087.93	22.39		0.17958	0.0036	0.05524	0.00118		1064.67	19.67	1086.64	22.65		0.07605	0.00111	0.17988	0.00329	1.88626	0.04471	0.05496	0.00078		1096.5	29	1066.33	18
#43-41.1	648.7	421.7	112.9	0.047	1.29	0.6669		0.08494	2e-05	0.20115	0.00312	2.3559	0.03749	0.0676	0.00112		1314.3	0.4	1181.5	16.7	1229.3	11.4	3.8	1322	21.3		0.19957	0.00328	0.06763	0.00122		1173	17.7	1322.6	23		0.08455	0.00028	0.20106	0.00312	2.34396	0.03811	0.06729	0.00044		1305.3	6.4	1181	16.7
#43-26.1	141.8	60.3	27	0.046	0.426	0.4363		0.08553	0.00051	0.21995	0.0039	2.5939	0.04846	0.06969	0.00176		1327.7	11.4	1281.61	20.61	1298.92	13.79	1.4	1361.54	33.36		0.2193	0.00431	0.06984	0.00188		1278.2	22.81	1364.35	35.41		0.08516	0.00065	0.21985	0.00389	2.58149	0.05071	0.06921	0.00125		1319.1	14.8	1281.11	20.62
#43-39.1	738	56	141.9	0.013	0.002	0.0778		0.08716	0.00036	0.22213	0.00219	2.66962	0.03015	0.06619	0.00219		1364.1	8	1293.1	11.5	1320.1	8.4	2	1295.4	41.7		0.22112	0.00245	0.06591	0.00232		1287.8	12.9	1289.9	44		0.08706	0.00038	0.2221	0.00219	2.6661	0.03032	0.06543	0.00215		1361.9	8.4	1293	11.6
#43-36.1	85.6	32.3	23.2	0.094	1.013	0.3876		0.12855	0.00099	0.31267	0.00715	5.54195	0.13513	0.10689	0.00269		2078.3	13.4	1753.8	35.2	1907.1	21.2	8	2052.3	49.2		0.3023	0.00823	0.10653	0.00319		1702.7	40.9	2045.8	58.2		0.12781	0.00131	0.3124	0.00715	5.50519	0.13944	0.1053	0.0017		2068.1	18	1752.5	35.2
[truncated: 18 more columns]
